# Supplementary material for: A Role for the Anti-Viral Host Defense Mechanism in the Phylogenetic Divergence in Baculovirus Evolution
Source: PubMed Central journal article supplement (PMC4887030; doi:10.1371/journal.pone.0156394), 2016-05-31
Supplement: pone.0156394.s002.pdf [file pone.0156394.s002.pdf]

**A ROLE FOR THE ANTI-VIRAL HOST DEFENSE MECHANISM  
IN THE PHYLOGENETIC DIVERGENCE IN BACULOVIRUS EVOLUTION**

Authors: Toshihiro Nagamine, Yasushi Sako

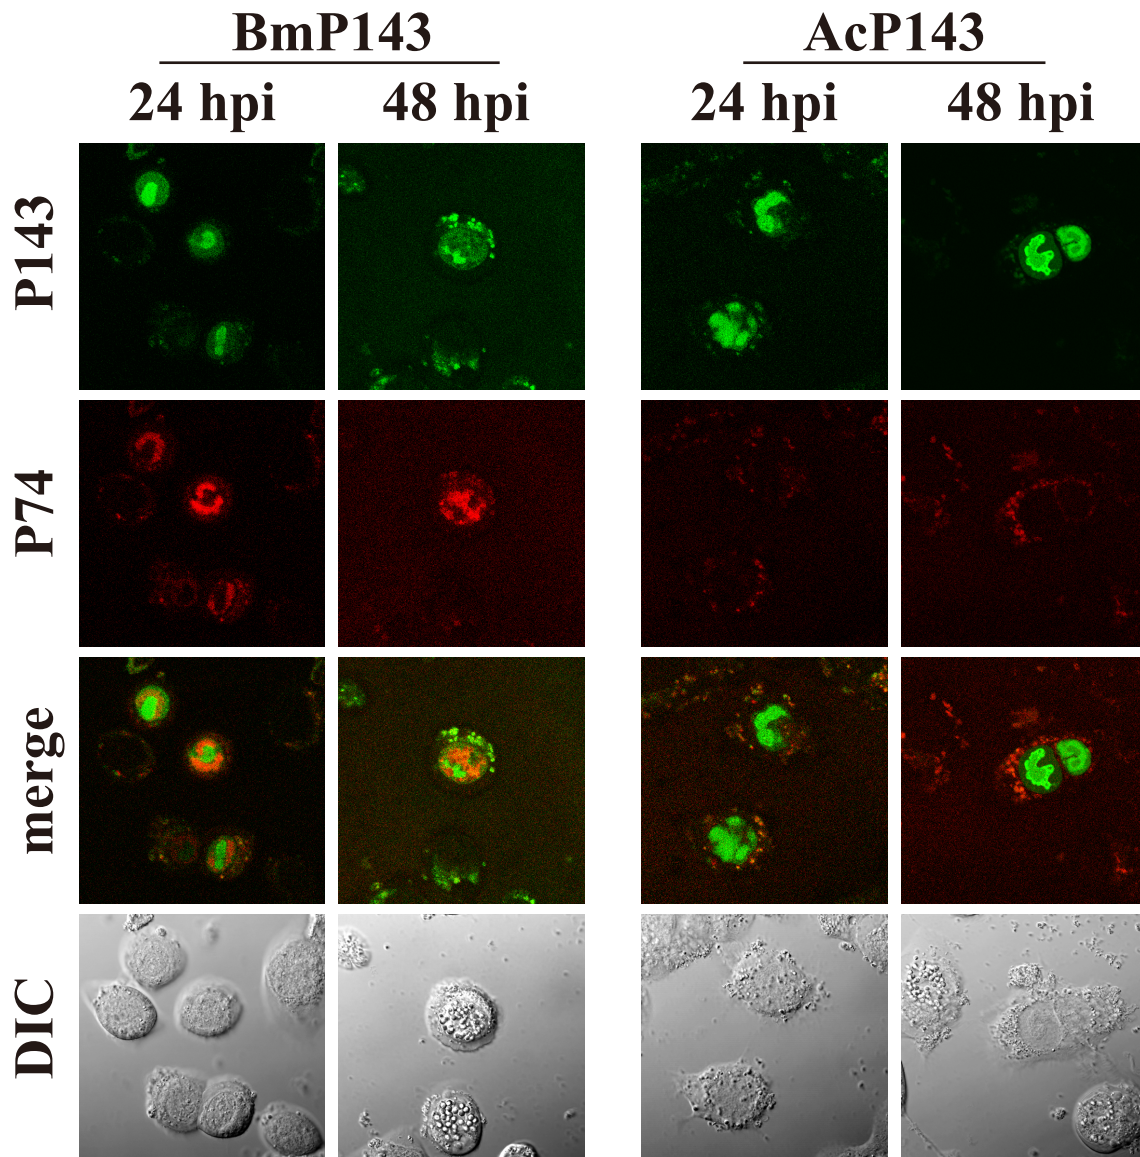

**S2 Fig. AcMNPV-P143 (AcP143) reduces late-gene expression and polyhedron formation in BmNPV-infected *B. mori* cells.** BmN cells were transfected with a plasmid expressing GFP-BmP143 (BmP143) or GFP-AcP143 (AcP143) in conjunction with a plasmid expressing Halo-tagged BmNPV-P74 under the control of the authentic *p74* promoter before infection with a wild-type of BmNPV. After 24 (24 hpi) and 48 h postinfection (48 hpi), the infected cells were stained with Halo Tag TMR Ligand (Promega) and analyzed by confocal microscopy.
