# Supplementary material for: A Role for the Anti-Viral Host Defense Mechanism in the Phylogenetic Divergence in Baculovirus Evolution
Source: PubMed Central journal article supplement (PMC4887030; doi:10.1371/journal.pone.0156394), 2016-05-31
Supplement: pone.0156394.s003.pdf [file pone.0156394.s003.pdf]

A ROLE FOR THE ANTI-VIRAL HOST DEFENSE MECHANISM  
IN THE PHYLOGENETIC DIVERGENCE IN BACULOVIRUS EVOLUTION

Authors: Toshihiro Nagamine, Yasushi Sako

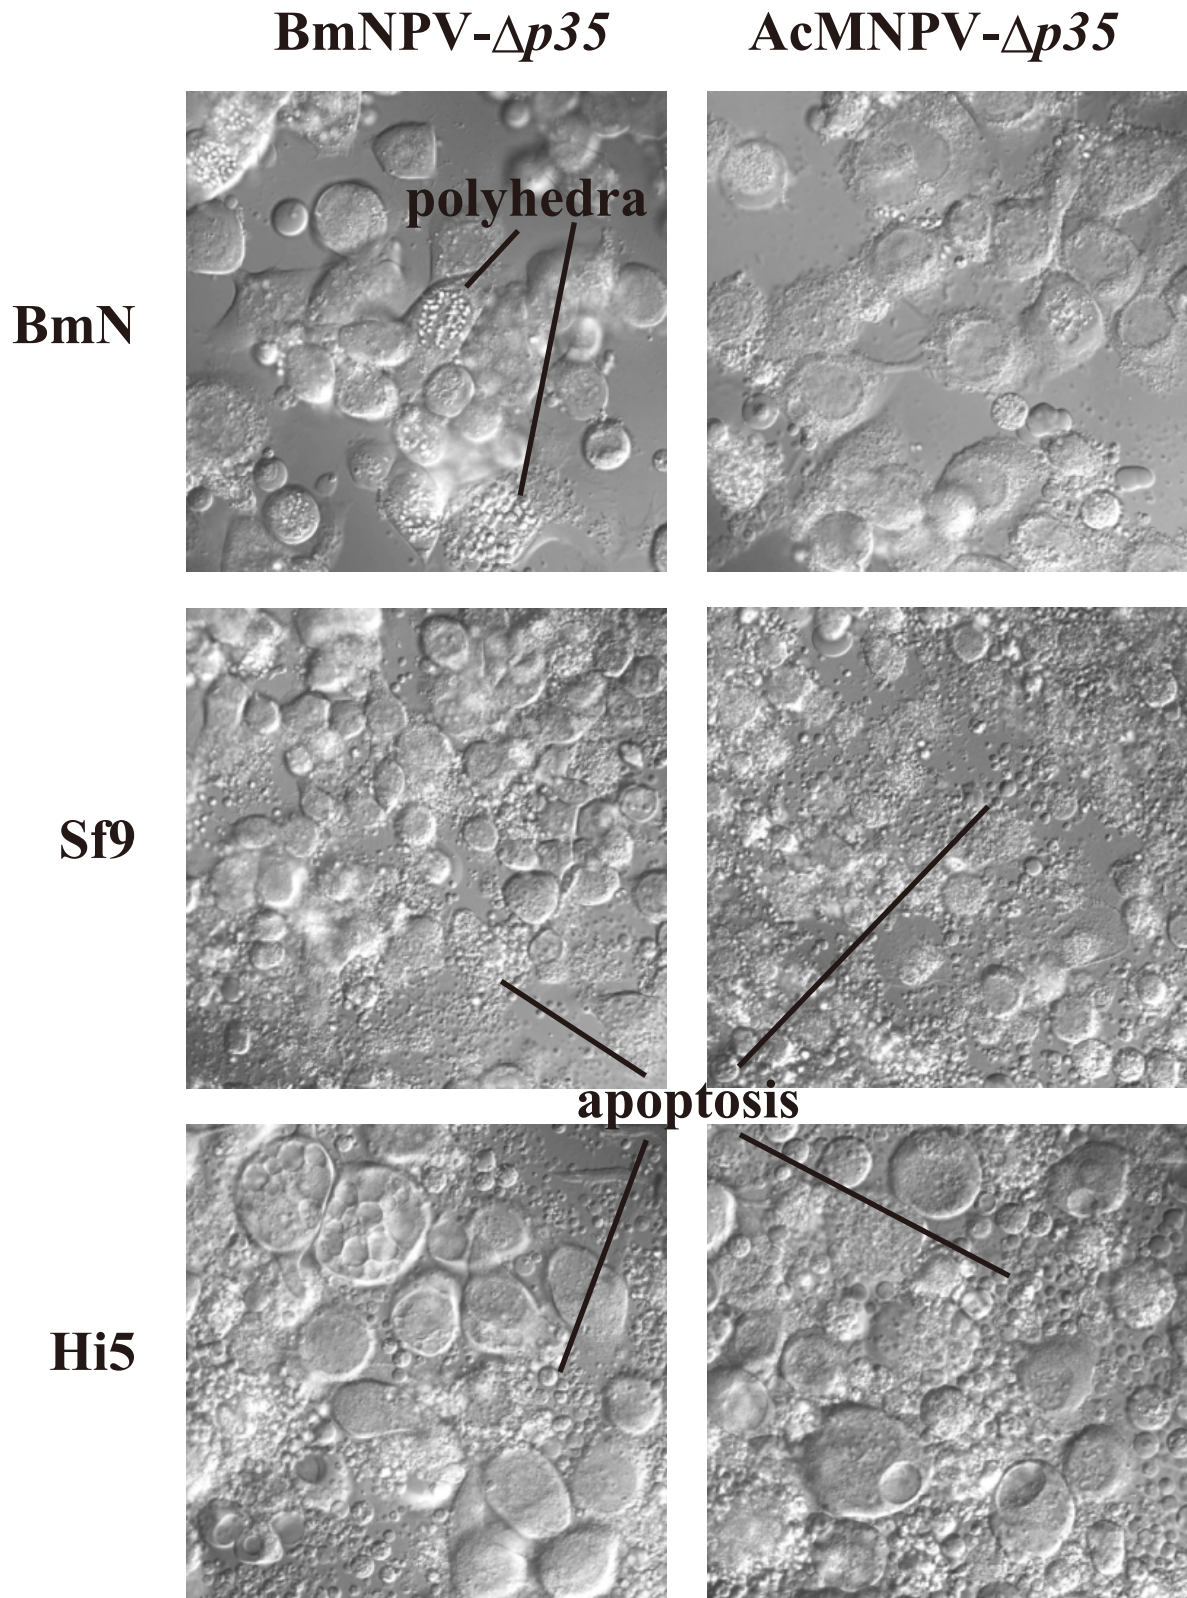

S3 Fig. *B. mori* (BmN), *S. frugiperda* (Sf9) and *T. ni* (Hi5) cells infected with BmNPV- and AcMNPV-mutants lacking the anti-apoptotic gene *p35*.
