# Supplementary material for: A Role for the Anti-Viral Host Defense Mechanism in the Phylogenetic Divergence in Baculovirus Evolution
Source: PLoS One. 2016 May 31;11(5):e0156394. doi: 10.1371/journal.pone.0156394 (PMC4887030; doi:10.1371/journal.pone.0156394)
Supplement: S1 Fig — Sequences that differ from the Bombyx mori NPV P143 sequence are indicated for each amino acid residue, whereas identical sequences are represented by dots. The amino acid residues targeted for mutagenesis in this experiment are marked by asterisks. (PDF) [file pone.0156394.s001.pdf]

Supplementary Information

A ROLE FOR THE ANTI-VIRAL HOST DEFENSE MECHANISM  
IN THE PHYLOGENETIC DIVERGENCE IN BACULOVIRUS EVOLUTION

Authors: Toshihiro Nagamine, Yasushi Sako

|                      |     |                                                                  |     |
|----------------------|-----|------------------------------------------------------------------|-----|
| <i>B.mori</i>        | 414 | ALKRCEPYKKQEKVVFNRTCNHWFDFTKLCVSLGYYYGIHYMIYLTLSAKNETLDDDELWAYT  | 478 |
| <i>B.mandarina</i>   | 414 | .....                                                            | 478 |
| <i>A.californica</i> | 413 | .....I.....A.....F.....Q.....I.....H.....                        | 477 |
| <i>M.vitrata</i>     | 411 | .....DRI.....A.....E·N·S.....F··F··Q····S·F····                  | 475 |
| <i>A. pernyi</i>     | 407 | ··E·R·FTTRGVAI··NL·D··HC·KGVNPY·M··S··A··F··KF·SSDAH-EC·DP··F·   | 470 |
|                      |     |                                                                  |     |
| <i>B.mori</i>        | 479 | YENVMALNLPDIDVCKGFFRKLENNVTGVNLVFNGKNYQIVKKEDDLFKLVKSNCYKLSNIFNN | 543 |
| <i>B.mandarina</i>   | 479 | .....                                                            | 543 |
| <i>A.californica</i> | 478 | .....H.....T.....                                                | 542 |
| <i>M.vitrata</i>     | 476 | .....K·SS.....H.....T····R····                                   | 540 |
| <i>A. pernyi</i>     | 471 | ·K·A·ECEV·LLVLGQA··I·V····Q·T·I··EH····D··Y··FNN·P··Q····        | 535 |
|                      |     |                                                                  |     |
|                      |     | *                      *                                         |     |
| <i>B.mori</i>        | 544 | WKYLYLTTYGVYNLFTNSFHSNCPFLGTTLPQTLKKPTDEEYLPEDAFNYMLSTSTDEL      | 603 |
| <i>B.mandarina</i>   | 544 | .....                                                            | 603 |
| <i>A.californica</i> | 543 | .....H····V····S····F····K····A····                              | 602 |
| <i>M.vitrata</i>     | 541 | .....H····V····S····F····K··SD····V····                          | 600 |
| <i>A. pernyi</i>     | 536 | ··M·H·K····VI·DE·Y····M·G·F·R·D·PP····V·A··T··AE·R               | 595 |

**S1 Fig. Amino acid sequence alignment of the P143-ScH regions from five nucleopolyhedroviruses; *Bombyx mori* NPV (*B. mori*), *Bombyx mandarina* NPV (*B. mandarina*), *Autographa californica* MNPV (*A. californica*), *Maruca vitrata* NPV (*M. vitrata*) and *Antheraea pernyi* NPV (*A. pernyi*).** Sequences that differ from the *Bombyx mori* NPV P143 sequence are indicated for each amino acid residue, whereas identical sequences are represented by dots. The amino acid residues targeted for mutagenesis in this experiment are marked by asterisks.
